# Supplementary material for: Pyridoxine-dependent epilepsy (PDE-ALDH7A1) in adulthood: A Dutch pilot study exploring clinical and patient-reported outcomes
Source: PubMed Central journal article supplement — Mol Genet Metab Rep. 2022 Mar 4;31:100853. doi: 10.1016/j.ymgmr.2022.100853 (PMC9248223; doi:10.1016/j.ymgmr.2022.100853), 2022-03-04
Supplement: mmc1.pdf [file mmc1.pdf]

## Supplementary figure 1. Distribution of scores on PROMIS Anxiety

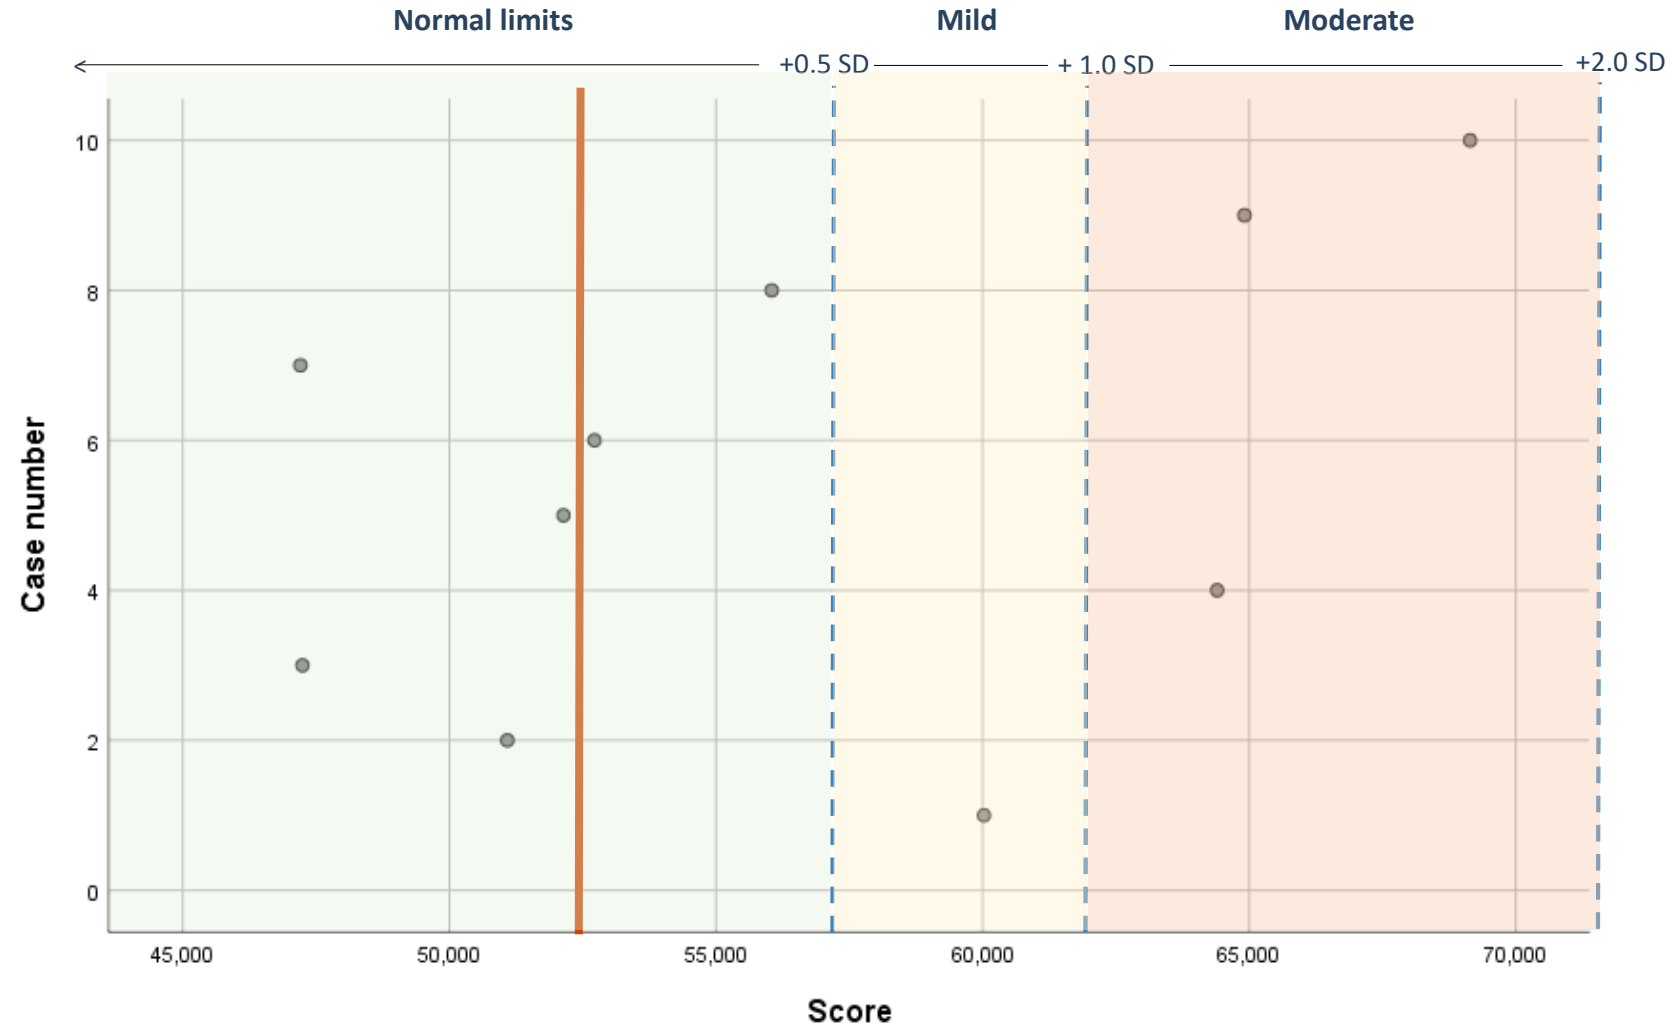

### **Supplementary figure 1. Distribution of scores of PROMIS Anxiety**

On the Y-axis the patient case numbers shown. On the X-axis the scores of the PROMIS Anxiety. The orange line displays the mean, the blue dotted lines display the standard deviation from the mean (SD).

Scores within SD +0.5 and +1 display mild deviance, scores within +1 and +2 SD display moderate deviancies and > 2 SD severe deviancies.

## Supplementary figure 2. Distribution of scores on PROMIS Depression

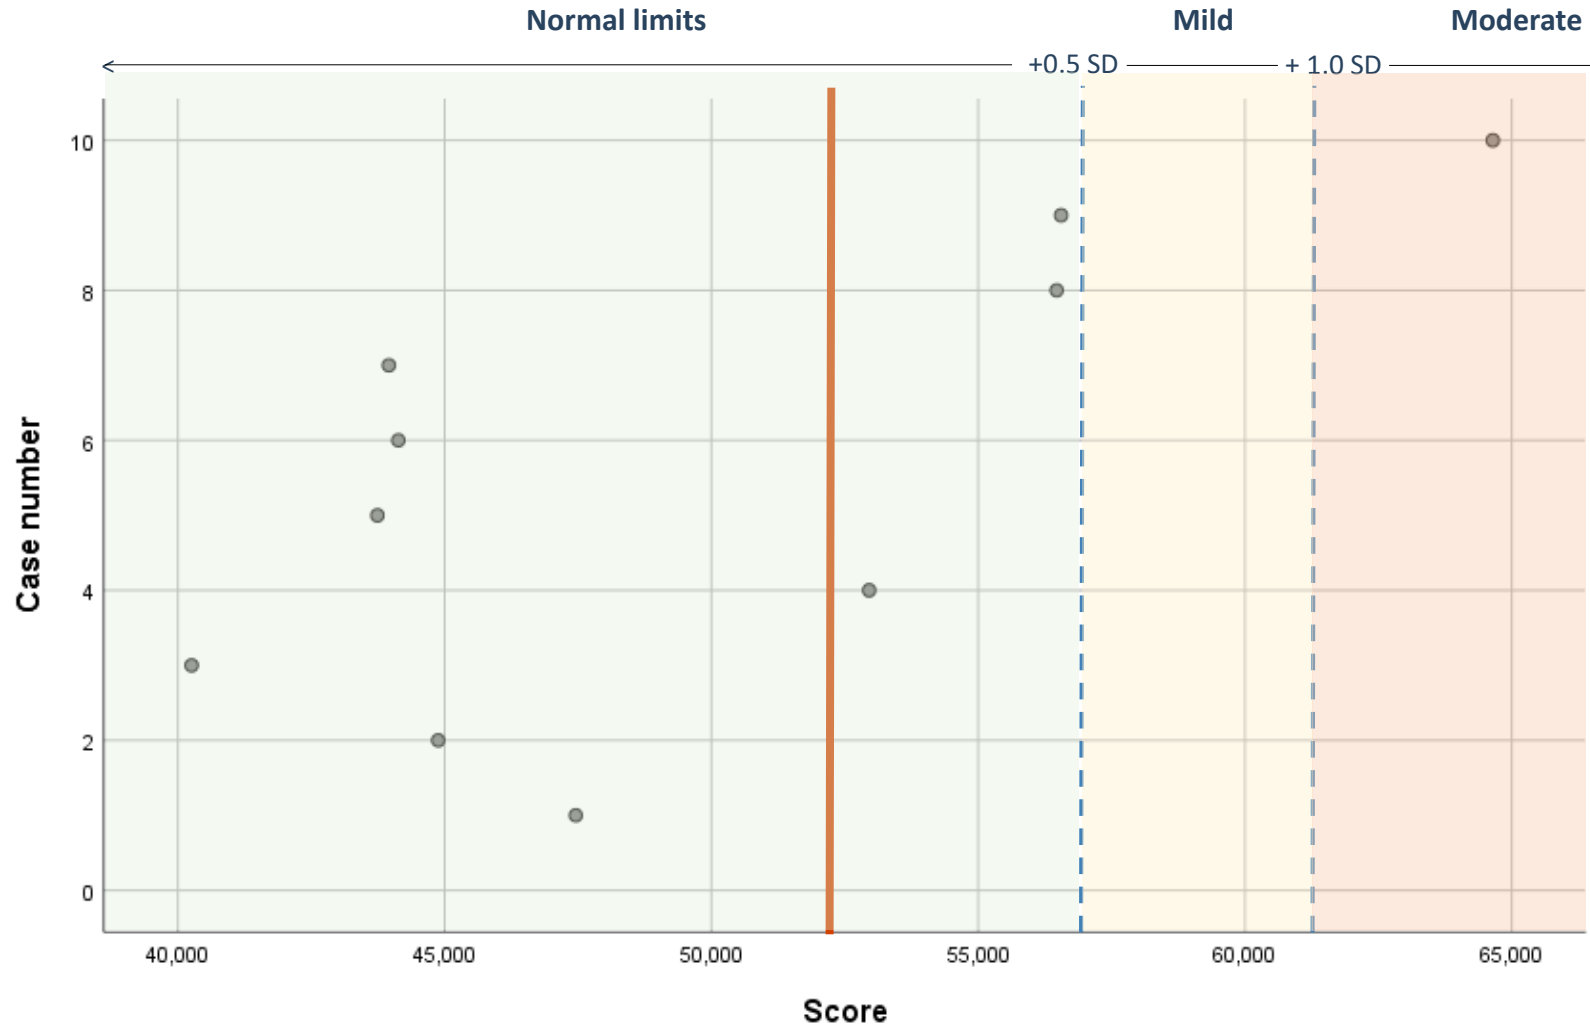

### **Supplementary figure 2. Distribution of scores of PROMIS Depression**

On the Y-axis the patient case numbers shown. On the X-axis the scores of the PROMIS Depression. The orange line displays the mean, the blue dotted lines display the standard deviation from the mean (SD).

Scores within SD +0.5 and +1 display mild deviance, scores within +1 and +2 SD display moderate deviancies and > 2 SD severe deviancies.

### Supplementary figure 3. Distribution of scores on PROMIS Anger

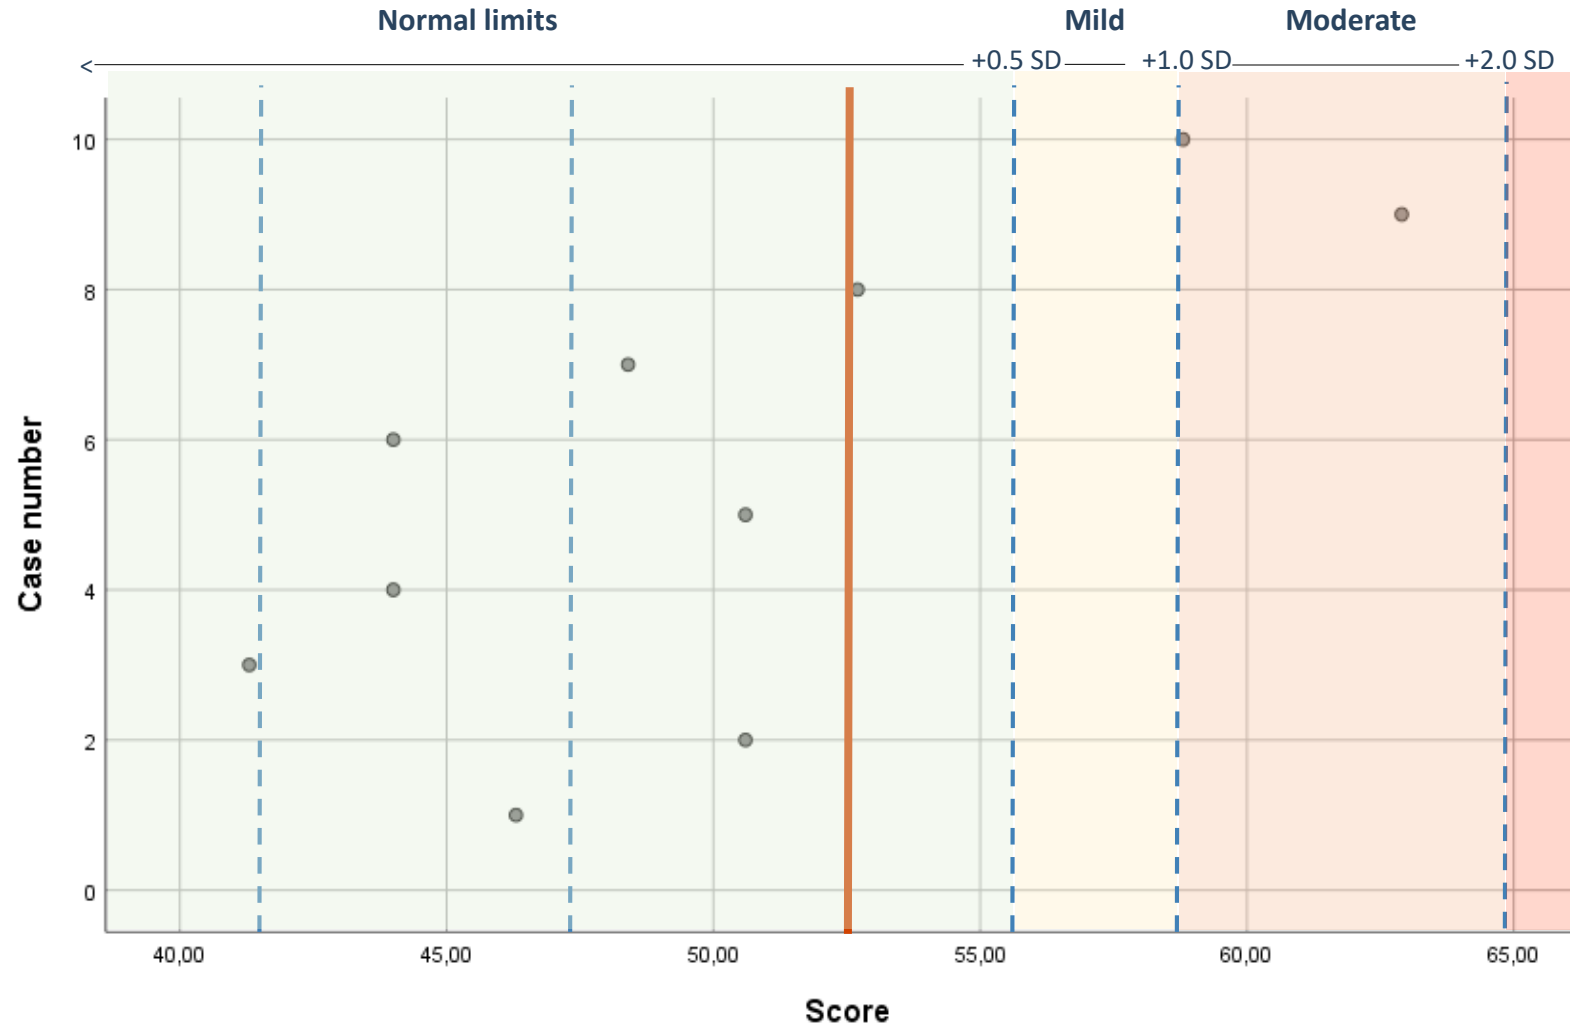

**Supplementary figure 3. Distribution of scores of PROMIS Anger**

On the Y-axis the patient case numbers shown. On the X-axis the scores of the PROMIS Anger. The orange line displays the mean, the blue dotted lines display the standard deviation from the mean (SD).

Scores within SD +0.5 and +1 display mild deviance, scores within +1 and +2 SD display moderate deviancies and > 2 SD severe deviancies.

## Supplementary figure 4. Distribution of scores on PROMIS Cognitive Functioning

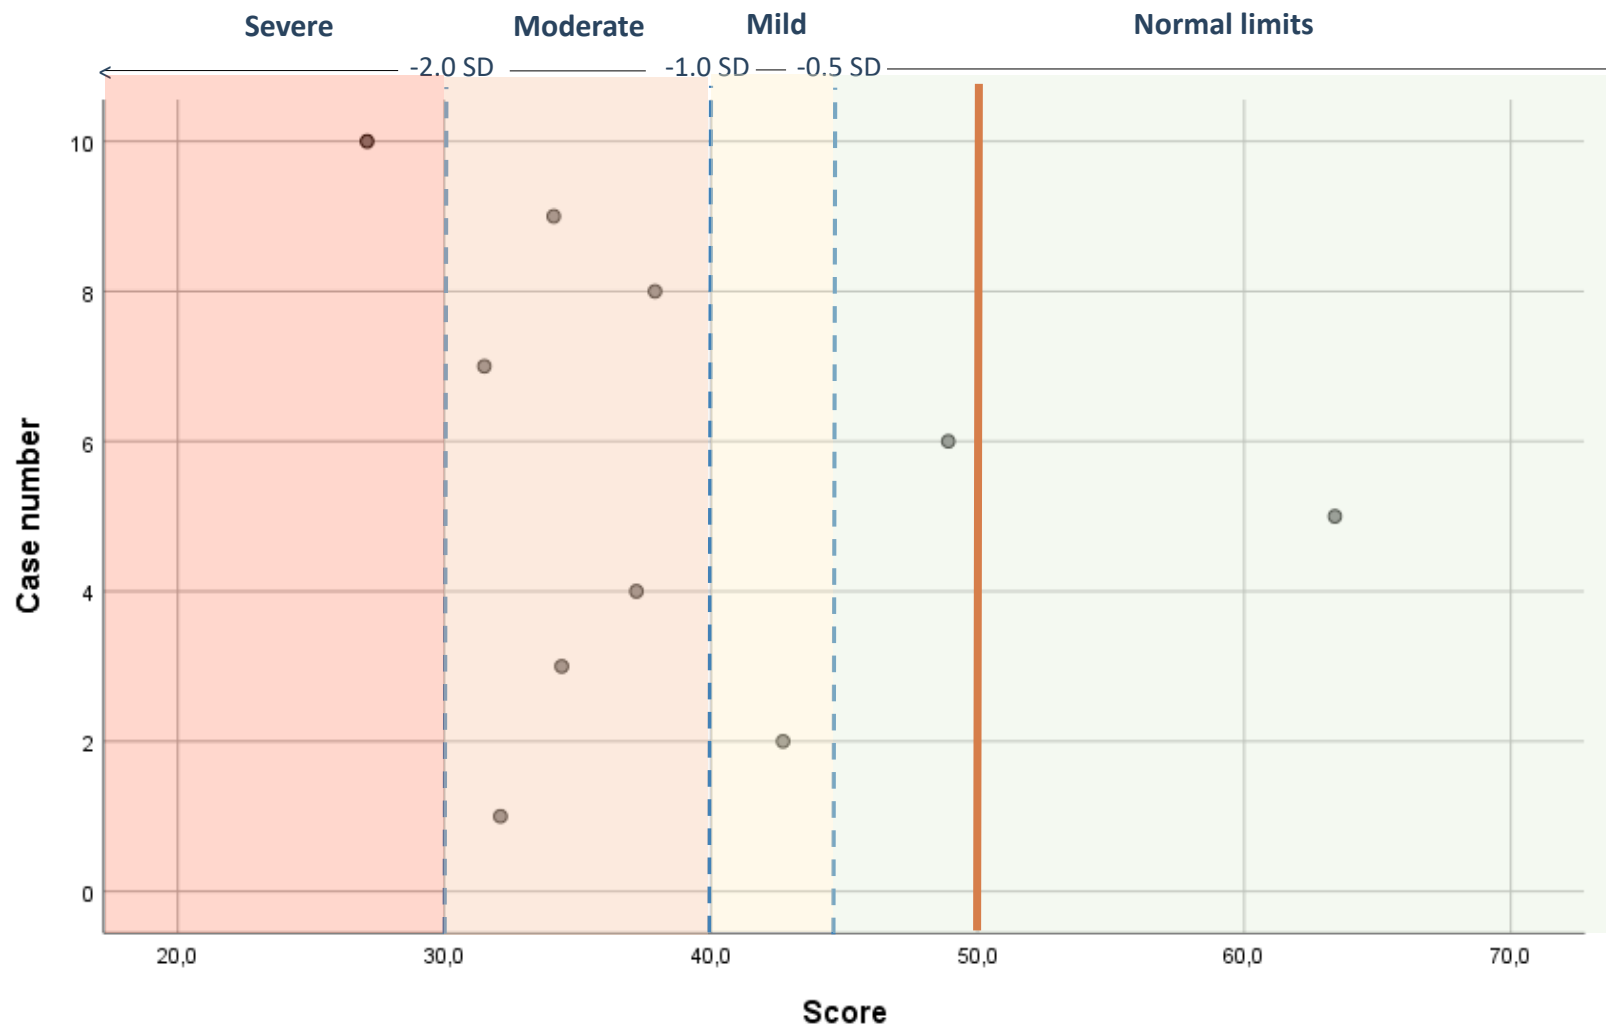

### **Supplementary figure 4. Distribution of scores of PROMIS Cognitive Functioning**

On the Y-axis the patient case numbers shown. On the X-axis the scores of the PROMIS Cognitive Functioning. The orange line displays the mean, the blue dotted lines display the standard deviation from the mean (SD).

Scores within SD -0.5 and -1 display mild deviance, scores within -1 and -2 SD display moderate deviancies and < 2 SD severe deviancies.

## Supplementary figure 5. Distribution of scores on PROMIS Cognitive Abilities

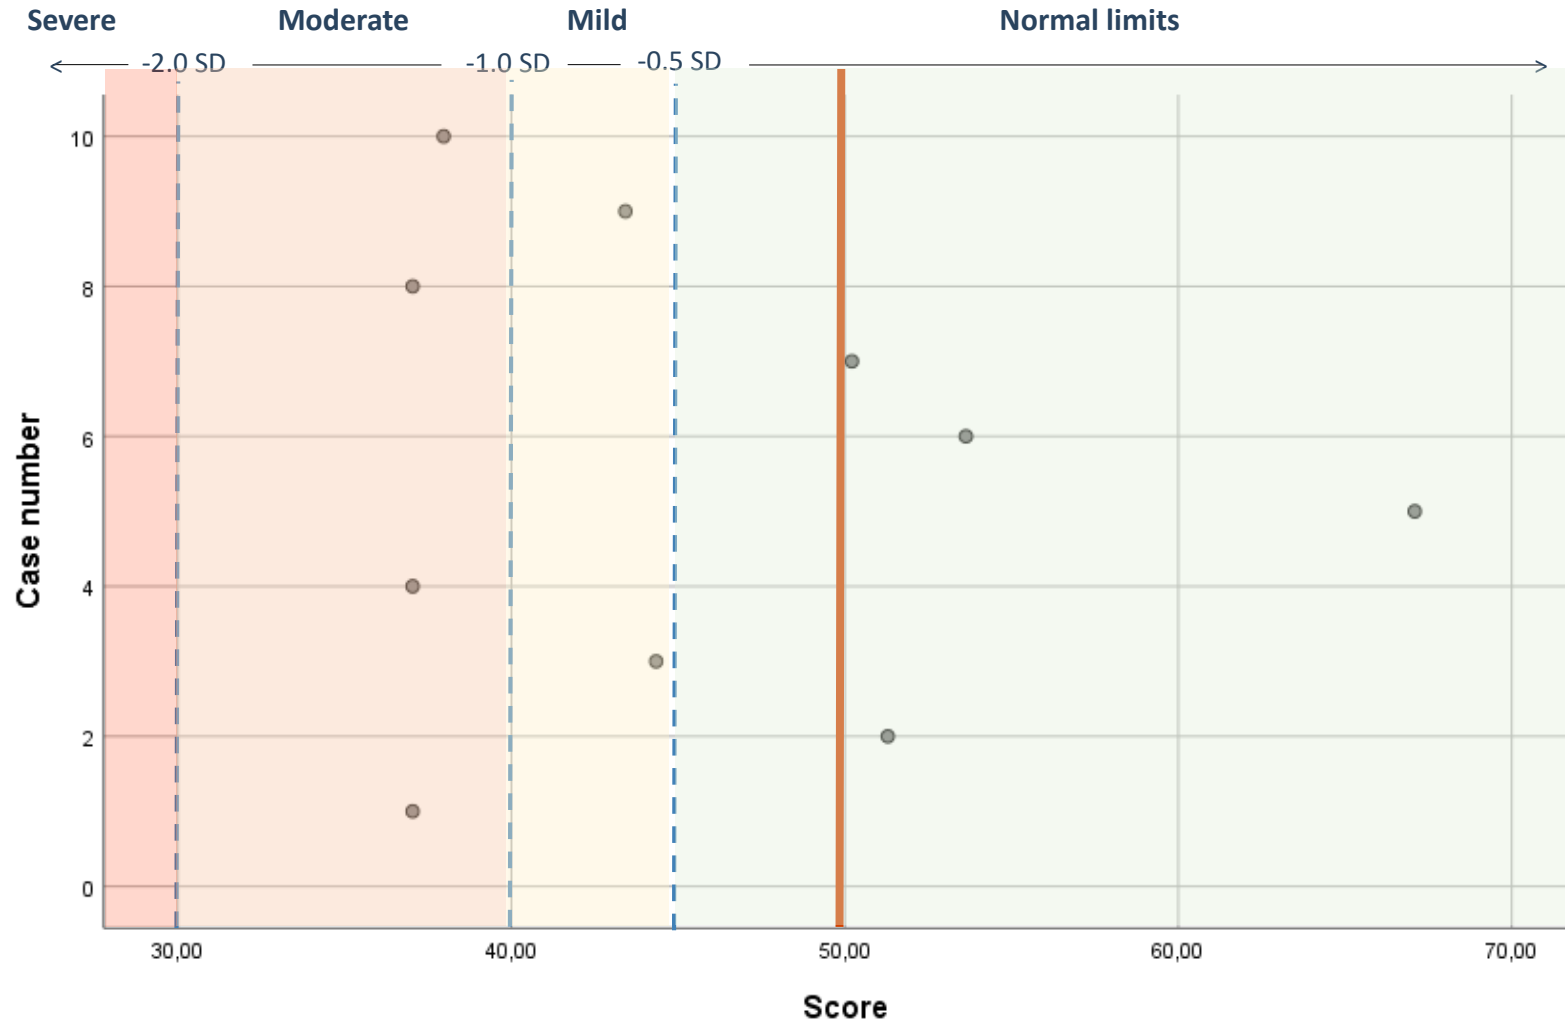

### **Supplementary figure 5. Distribution of scores of PROMIS Cognitive Abilities**

On the Y-axis the patient case numbers shown. On the X-axis the scores of the PROMIS Cognitive Abilities. The orange line displays the mean, the blue dotted lines display the standard deviation from the mean (SD).

Scores within SD -0.5 and -1 display mild deviance, scores within -1 and -2 SD display moderate deviancies and < 2 SD severe deviancies.

## Supplementary figure 6. Distribution of scores on PROMIS Physical Functioning

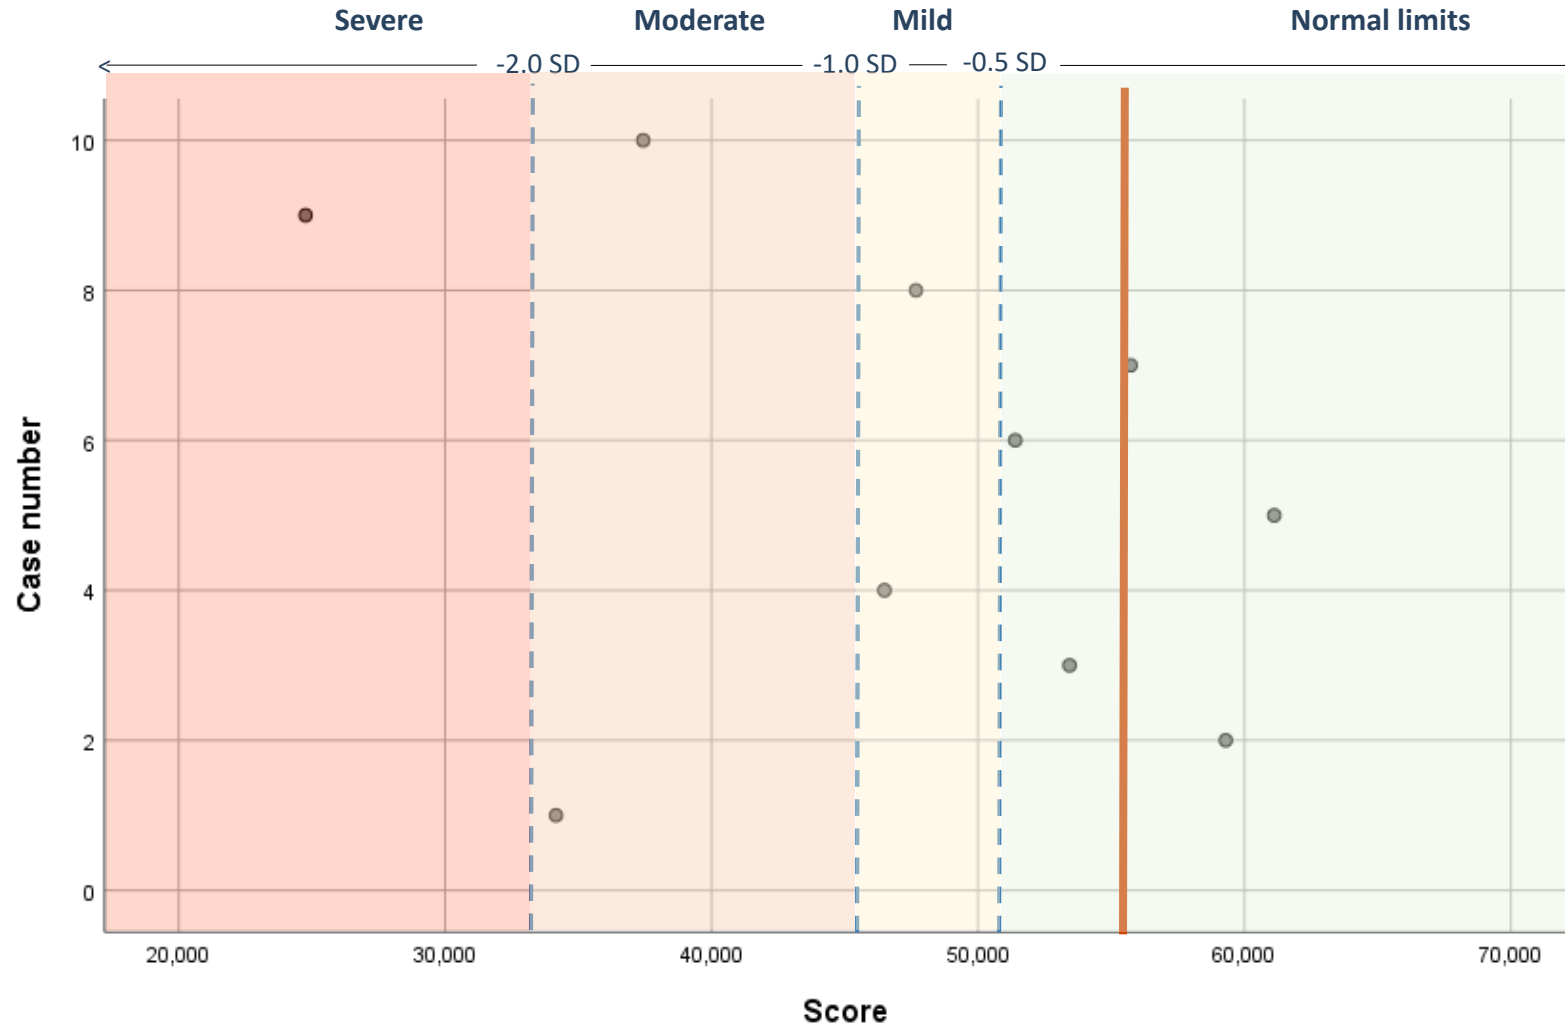

**Figure 1. Distribution of scores of PROMIS Physical Functioning**

On the Y-axis the patient case numbers shown. On the X-axis the scores of the PROMIS Physical Functioning. The orange line displays the mean, the blue dotted lines display the standard deviation from the mean (SD).

Scores within SD -0.5 and -1 display mild deviance, scores within -1 and -2 SD display moderate deviancies and < 2 SD severe deviancies.

# Supplementary figure 7. Distribution of scores on PROMIS Satisfaction with social roles and activities

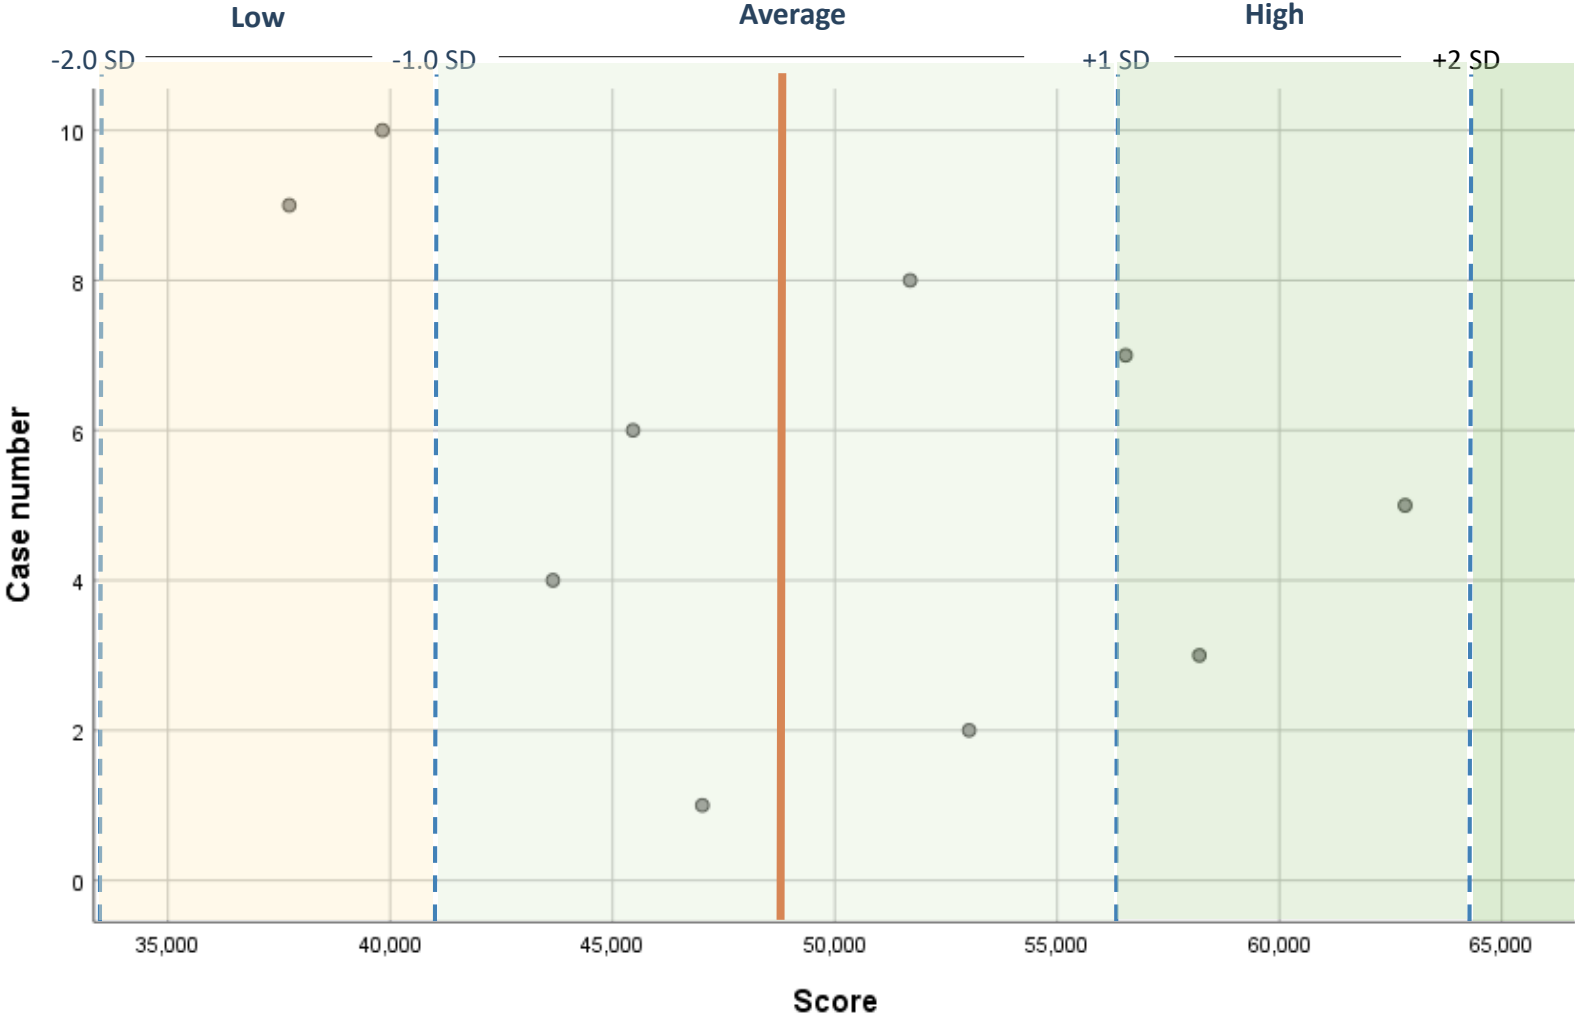

**Supplementary figure 6. Distribution of scores of PROMIS Satisfaction with social roles and activities**  
On the Y-axis the patient case numbers shown. On the X-axis the scores of the PROMIS Satisfaction with social roles and activities. The orange line displays the mean, the blue dotted lines represent standard deviations (SD) from the mean. Scores within +/- 1 SD from the mean are average. Scores within +/- 1.0 to 2.0 SD from the mean represent low/high scores. Scores > +/- 2.0 SD from the mean represent very high/very low scores (no scores in these ranges).
